# Supplementary material for: Nature of Tumor Control by Permanently and Transiently Modified GD2 Chimeric Antigen Receptor T Cells in Xenograft Models of Neuroblastoma
Source: Oxford University Press journal article supplement (doi:10.1158/2326-6066.cir-14-0051), 2014-08-08
Supplement: 23266066cir140051-sup-128931_1_supp_0_n9lf9v.docx [file 23266066cir140051-sup-128931_1_supp_0_n9lf9v.docx]

**Supplemental Figure 1.** **Disseminated model of neuroblastoma.** 2x106 SY5Y-CBG cells were delivered via tail vein injection. Bioluminescent imaging to follow tumor progression was performed 6 minutes after intraperitoneal administration of 150 mg/kg D-luciferin.

**Supplemental Figure 2. Cell growth of RNA-electroporated and lentivirus-transduced T cells.** Fold-growth is displayed on the Y-axis, and day of culture on the X-axis. Cell populations were stimulated separately using CD3/CD28 stimulatory beads on day 0. Lentiviral cells were transduced on Day 1. All cells were de-beaded on day 8, and frozen when growth kinetics and cell size (see Supplemental Figure 3) suggested cells had rested down from activation. Prior to infusion, all cells were thawed and cultured for 16 hours. RNA-transfected cells were electroporated 1-2 hours prior to infusion. Cells were counted and cell sizes measured using a Beckman Coulter Counter Multisizer 3.

**Supplemental Figure 3. Cell growth of RNA-electroporated and lentivirus-transduced T cells.** Cell size (fL) is displayed on the Y-axis and day of culture on the X-axis. All culture procedures are identical to those described in Supplemental Figure 2.
